# Supplementary material for: Nanocomposite functionalized membranes based on silica nanoparticles cross-linked to electrospun nanofibrous support for arsenic( v ) adsorption from contaminated underground water
Source: Royal Society of Chemistry journal article supplement (doi:10.1039/c8ra09866b), 2019-01-01

Electronic Supplementary Information

ESI 1. Picture of electrospun nanofiber membrane after functionalization

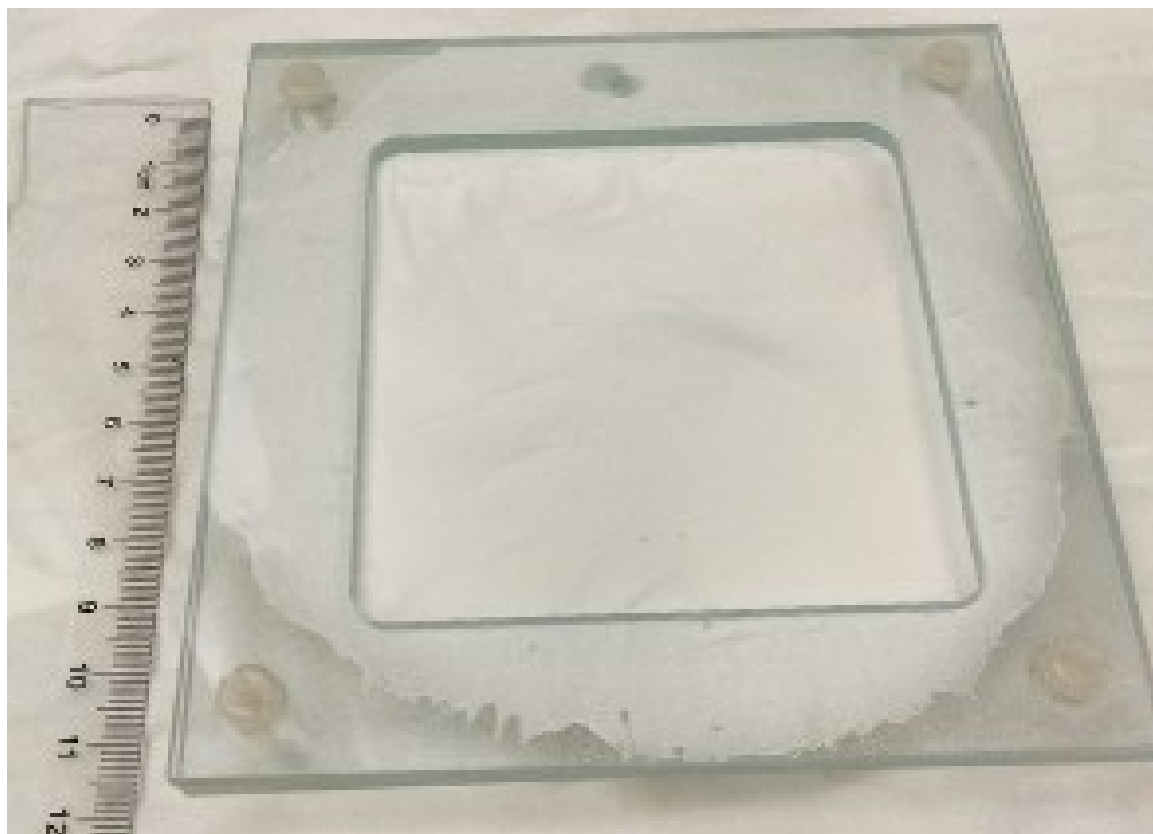

ESI 2. Modeling of adsorption capacity for mPAN / MCM-NH<sub>2</sub>-Fe<sup>3+</sup> and mPAN / MCM-PEI-Fe<sup>3+</sup> using intraparticle diffusion model. Experimental data is represented by (▲) for mPAN / MCM-NH<sub>2</sub>-Fe<sup>3+</sup> and (●) for PAN / MCM-PEI-Fe<sup>3+</sup>. Dashed dot lines represent zones which exhibit linear behavior.

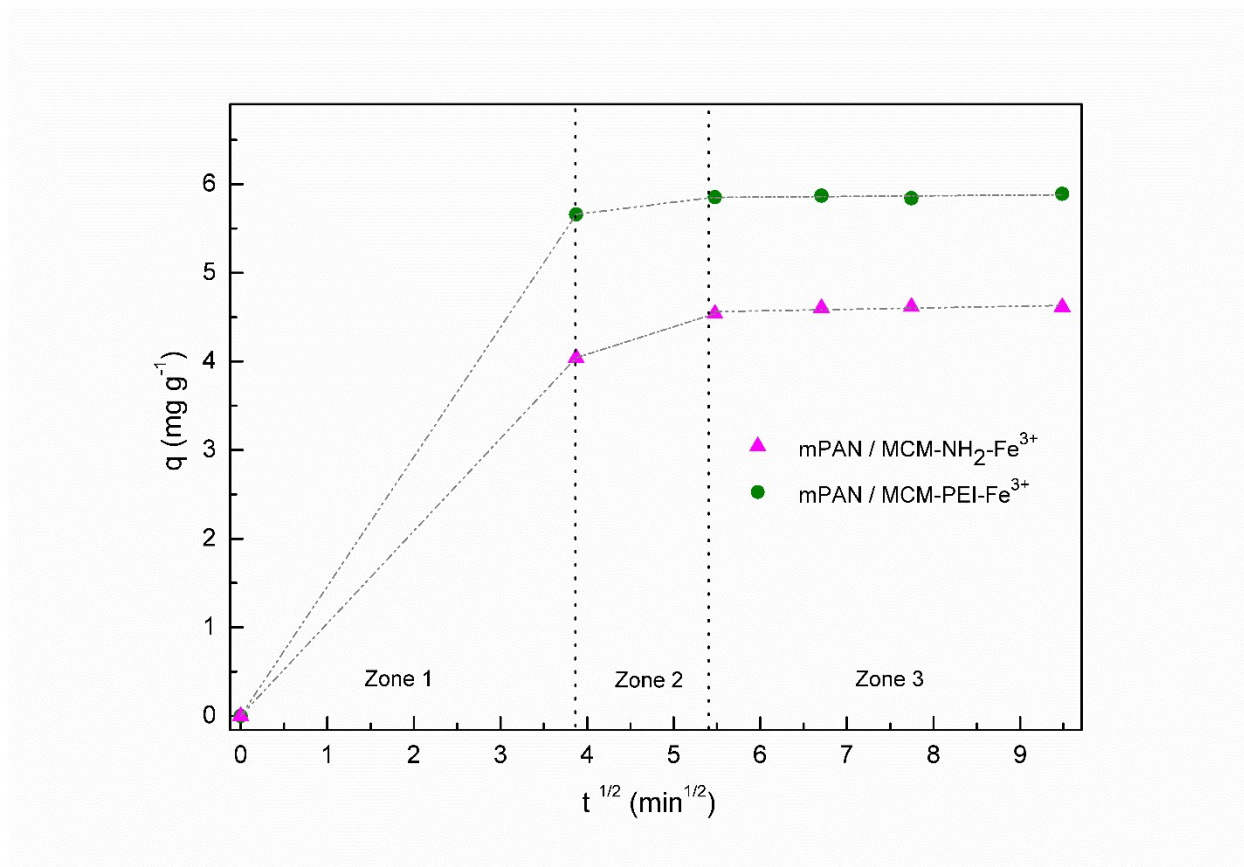

Supplement: c8ra09866b1.pdf [file c8ra09866b1.pdf]
